# Supplementary material
Source: HighWire-hosted journal article supplement (https://jmg.bmj.com/content/61/2/142)
Supplement: inline-supplementary-material-1 [file inline-supplementary-material-1.pdf]

**Supplementary File 1.** Pre-meeting surveys

## Pre-meeting survey for Day 1: Lynch syndrome Patient resources - genetic testing for Lynch Syndrome

**Question Title**

1. Do you provide patient information leaflets in your clinical practice relating to genetic testing for Lynch?

- Yes  
 No

**Question Title**

2. Do these include locally written/curated patient information leaflets?

- Yes  
 No  
 Unsure  
 I don't use patient information leaflets regarding genetic testing for Lynch (go to question 3)

2a) Has there been any patient input or involvement in developing the leaflets?

Yes  
No

Unsure

Comments: [free text]

**Question Title**

3. Do you ever signpost patients to charities or support organisations regarding Lynch?

- Yes  
 No

**Question Title**

4. What charities/support organisations do you signpost to?

**Question Title**

5. What additional patient leaflets/resources would be helpful in your clinical practice relating to genetic testing for Lynch?

6. Please add any leaflets currently used by your service to the [google drive] or send to the meeting organisers as an attachment. These will be collated and shared for information prior to the meeting.

## Pre-meeting survey for Day 2: Haematology Patient resources - genetic testing in haematological malignancy

### Question Title

1. Do you provide patient information leaflets in your clinical practice relating to genetic testing in haematological malignancy?

- Yes  
 No

### Question Title

2. Do these include locally written/curated patient information leaflets?

- Yes  
 No  
 Unsure  
 I don't use patient information leaflets regarding genetic testing in haematological malignancy

### Question Title

3. Do you ever signpost patients to charities or support organisations regarding haem/myeloid disease?

- Yes  
 No

### Question Title

4. What charities/support organisations do you signpost to?

### Question Title

5. What additional patient leaflets/resources would be helpful in your clinical practice relating to genetic testing in the haematological setting?

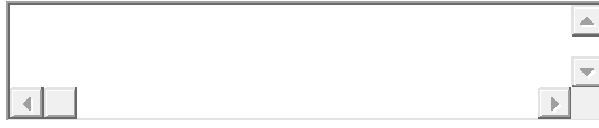

Done
